# Supplementary material for: Molecular Basis of Antigenic Drift in Serotype O Foot-and-Mouth Disease Viruses (2013–2018) from Southeast Asia
Source: MDPI journal article supplement (doi:10.3390/v13091886), 2021-09-21
Supplement: s1 [file s1]

Supplementary Materials

# Molecular Basis of Antigenic Drift in Serotype O Foot-and-Mouth Disease Viruses (2013–2018) from Southeast Asia

**Table S1.** List of serotype O FMD viruses used in this study.

| SL NO | Virus Name    | Country   | Region                                         | Date Collected | Host    | Topo-type | Strain   | Accession No |
|-------|---------------|-----------|------------------------------------------------|----------------|---------|-----------|----------|--------------|
| 1     | O/HKN/1983*   | Hong Kong | Hong Kong                                      | 1983           | Pig     | CA-THAY   |          | KJ831676     |
| 2     | O/IND/R2/75*  | India     | India                                          | 1975           | NK      | ME-SA     | Branch B | AF204276     |
| 3     | O/MYA/2009*   | Myanmar   | Magway, Myanmar                                | 29/10/2009     | Cattle  | SEA       | Mya-98   | KR265080     |
| 4     | O/PanAsia-2*  | Turkey    | Turkey                                         | 01/01/2009     | Cattle  | ME-SA     | PanAsia  | KP202878     |
| 5     | O/CAM/01/2013 | Cambodia  | Kampong Speu Province                          | 19/09/2013     | Cattle  | ME-SA     | PanAsia  | ND           |
| 6     | O/CAM/02/2013 | Cambodia  | Svay Rieng Province                            | 19/09/2013     | Cattle  | ME-SA     | PanAsia  | ND           |
| 7     | O/CAM/01/2015 | Cambodia  | Bakan                                          | 14/09/2015     | Pig     | ME-SA     | PanAsia  | MZ851285     |
| 8     | O/CAM/03/2015 | Cambodia  | Bakan                                          | 14/09/2015     | Pig     | ME-SA     | PanAsia  | MZ851286     |
| 9     | O/CAM/03/2016 | Cambodia  | Domreyslab, Tree commune, Kandalsteung, Kandal | 02/12/2016     | Pig     | ME-SA     | PanAsia  | MZ851287     |
| 10    | O/HKN/01/2013 | Hong Kong | NK                                             | 02/04/2013     | Pig     | CA-THAY   | N/A      | MZ851288     |
| 11    | O/HKN/08/2014 | Hong Kong | NK                                             | 24/02/2014     | Pig     | CA-THAY   | N/A      | MZ851289     |
| 12    | O/HKN/11/2014 | Hong Kong | NK                                             | 06/03/2014     | Pig     | CA-THAY   | N/A      | MZ851290     |
| 13    | O/HKN/05/2015 | Hong Kong | Sai Kung, New Territories                      | 18/09/2015     | Porcine | CA-THAY   | N/A      | MZ851291     |
| 14    | O/HKN/06/2015 | Hong Kong | Sai Kung, New Territories                      | 18/09/2015     | Porcine | CA-THAY   | N/A      | MZ851292     |
| 15    | O/HKN/10/2015 | Hong Kong | NK                                             | 07/11/2015     | Porcine | CA-THAY   | N/A      | MZ851293     |
| 16    | O/HKN/12/2015 | Hong Kong | Shueng Shui                                    | 02/12/2015     | Pig     | CA-THAY   | N/A      | MZ851294     |
| 17    | O/HKN/02/2016 | Hong Kong | Sai Kung, New Territories                      | 06/08/2016     | Porcine | CA-THAY   | N/A      | MZ851295     |
| 18    | O/HKN/03/2016 | Hong Kong | Sai Kung, New Territories                      | 06/08/2016     | Pig     | CA-THAY   | N/A      | MZ851296     |
| 19    | O/HKN/05/2016 | Hong Kong | Sai Kung, New Territories                      | 06/08/2016     | Porcine | CA-THAY   | N/A      | MZ851297     |
| 20    | O/HKN/07/2016 | Hong Kong | Sai Kung, New Territories                      | 06/08/2016     | Pig     | CA-THAY   | N/A      | MZ851298     |
| 21    | O/HKN/01/2017 | Hong Kong | Sheung Shui, New Territorie                    | 11/09/2017     | Porcine | CA-THAY   | N/A      | MZ851299     |
| 22    | O/HKN/03/2017 | Hong Kong | Sheung Shui, New Territories                   | 11/09/2017     | Porcine | CA-THAY   | N/A      | MZ851300     |

|    |               |                   |                                           |            |               |         |           |          |
|----|---------------|-------------------|-------------------------------------------|------------|---------------|---------|-----------|----------|
| 23 | O/HKN/04/2017 | Hong Kong         | Sheung Shui, New Territories              | 14/09/2017 | Porcine       | CA-THAY | N/A       | MZ851301 |
| 24 | O/HKN/04/2018 | Hong Kong         | San Tin, Yuen Long, New Territories       | 28/02/2018 | Porcine       | CA-THAY | N/A       | MZ851302 |
| 25 | O/HKN/05/2018 | Hong Kong         | San Tin, Yuen Long, New Territories       | 07/03/2018 | Porcine       | CA-THAY | N/A       | MZ851303 |
| 26 | O/HKN/06/2018 | Hong Kong         | San Tin, Yuen Long, New Territories       | 07/03/2018 | Porcine       | CA-THAY | N/A       | ND       |
| 27 | O/LAO/04/2015 | Laos              | Naxaythong, Vientiane                     | 10/06/2015 | NK            | ME-SA   | Ind-2001d | MZ851304 |
| 28 | O/LAO/05/2015 | Laos              | Naxaythong, Vientiane                     | 10/06/2015 | NK            | ME-SA   | Ind-2001d | MZ851305 |
| 29 | O/LAO/01/2017 | Laos              | Vangpho, Parknguem, Vientiane City        | 30/01/2017 | Cattle        | SEA     | Mya-98    | MZ851306 |
| 30 | O/MAY/01/2013 | Malaysia          | Kulaijaya, Johor                          | 06/01/2013 | Cattle        | SEA     | Mya-98    | MZ851307 |
| 31 | O/MAY/10/2014 | Malaysia          | Bachok, Perupok, Kelantan                 | 01/07/2014 | cattle        | SEA     | Mya-98    | MZ851308 |
| 32 | O/MAY/01/2015 | Malaysia          | Kuala Berang, Terengganu                  | 26/03/2015 | cattle        | SEA     | Mya-98    | MZ851309 |
| 33 | O/MAY/04/2016 | Malaysia          | Jasin, Selandar, Melaka                   | 14/03/2016 | cattle        | SEA     | Mya-98    | MZ851310 |
| 34 | O/MAY/07/2016 | Malaysia          | Hilir Perak, Hutan Melintang, Perak       | 02/06/2016 | cattle        | SEA     | Mya-98    | MZ851311 |
| 35 | O/MAY/10/2016 | Malaysia          | Melaka Tengah, Ayer Molek, Melaka         | 08/08/2016 | cattle        | SEA     | Mya-98    | MZ851312 |
| 36 | O/MOG/01/2015 | Mongolia          | NK                                        | 28/02/2015 | Cattle        | SEA     | Mya-98    | MZ851313 |
| 37 | O/MOG/02/2015 | Mongolia          | NK                                        | 28/02/2015 | Cattle        | SEA     | Mya-98    | MZ851314 |
| 38 | O/MOG/04/2015 | Mongolia          | NK                                        | 28/02/2015 | Cattle        | SEA     | Mya-98    | MZ851315 |
| 39 | O/MYA/01/2015 | Myanmar           | Mahlaing, Mandalay                        | 29/10/2015 | Bovine        | SEA     | Mya-98    | MZ851316 |
| 40 | O/SKR/12/2014 | Republic of Korea | NK                                        | 03/12/2014 | Pig           | SEA     | Mya-98    | MZ851317 |
| 41 | O/SKR/14/2014 | Republic of Korea | NK                                        | 03/12/2014 | Pig           | SEA     | Mya-98    | MZ851318 |
| 42 | O/SKR/18/2014 | Republic of Korea | NK                                        | 03/12/2014 | Pig           | SEA     | Mya-98    | MZ851319 |
| 43 | O/TAI/10/2014 | Thailand          | Lai Nan, Wiang Sa, Nan, Thailand          | 10/03/2014 | Cattle        | SEA     | Mya-98    | MZ851320 |
| 44 | O/TAI/16/2015 | Thailand          | Lumpayaklang, Mouklek, Saraburi, Thailand | 20/05/2015 | Cattle        | ME-SA   | PanAsia   | MZ851321 |
| 45 | O/TAI/18/2015 | Thailand          | Banlao, Mayjai, Payao                     | 28/07/2015 | Water Buffalo | SEA     | Mya-98    | MZ851322 |
| 46 | O/TAI/27/2015 | Thailand          | Kangkajan, Kangkajan, Petchaburi          | 28/09/2015 | Cattle        | SEA     | Mya-98    | ND       |
| 47 | O/TAI/30/2015 | Thailand          | Chachang, Sunkumpang, Chaing Mai          | 13/11/2015 | Cattle        | SEA     | Mya-98    | MZ851323 |
| 48 | O/TAI/02/2016 | Thailand          | Huanadum, Kanoun, Khonkean                | 11/01/2016 | Cattle        | SEA     | Mya-98    | MZ851324 |
| 49 | O/TAI/05/2016 | Thailand          | Nong Or, Ban Pong, Ratchburi              | 26/01/2016 | Pig           | SEA     | Mya-98    | MZ851325 |

|    |               |          |                            |            |               |       |           |          |
|----|---------------|----------|----------------------------|------------|---------------|-------|-----------|----------|
| 50 | O/TAI/14/2016 | Thailand | Wokeaw, Hangchath, Lumpang | 03/03/2016 | Cattle        | SEA   | Mya-98    | MZ851326 |
| 51 | O/VIT/32/2013 | Vietnam  | Son La                     | 30/05/2013 | Cattle        | ME-SA | PanA-sia  | ND       |
| 52 | O/VIT/37/2013 | Vietnam  | Bac Ninh                   | 13/08/2013 | Cattle        | ME-SA | PanA-sia  | MZ851327 |
| 53 | O/VIT/39/2013 | Vietnam  | Bac Can,                   | 24/08/2013 | Cattle        | ME-SA | PanA-sia  | ND       |
| 54 | O/VIT/45/2013 | Vietnam  | Quang Tri                  | 23/10/2013 | Water Buffalo | ME-SA | PanA-sia  | MZ851328 |
| 55 | O/VIT/51/2013 | Vietnam  | Lam Dong                   | 30/10/2013 | Cattle        | ME-SA | PanA-sia  | MZ851329 |
| 56 | O/VIT/09/2014 | Vietnam  | Son La,                    | 24/04/2014 | Cattle        | ME-SA | PanA-sia  | MZ851330 |
| 57 | O/VIT/16/2014 | Vietnam  | Tien Giang                 | 30/04/2014 | Pig           | ME-SA | PanA-sia  | MZ851331 |
| 58 | O/VIT/21/2014 | Vietnam  | Quang Nam                  | 20/06/2014 | Cattle        | SEA   | Mya-98    | MZ851332 |
| 59 | O/VIT/24/2014 | Vietnam  | Long An                    | 10/07/2014 | Pig           | ME-SA | PanA-sia  | ND       |
| 60 | O/VIT/27/2014 | Vietnam  | Kon Tum                    | 17/07/2014 | Cattle        | SEA   | Mya-98    | MZ851333 |
| 61 | O/VIT/04/2015 | Vietnam  | Long An                    | 27/04/2015 | Cattle        | SEA   | Mya-98    | MZ851334 |
| 62 | O/VIT/05/2015 | Vietnam  | Lao Cai                    | 10/07/2015 | Cattle        | ME-SA | Ind-2001d | ND       |
| 63 | O/VIT/08/2015 | Vietnam  | Lao Cai                    | 10/07/2015 | Cattle        | ME-SA | Ind-2001d | MZ851335 |
| 64 | O/VIT/18/2015 | Vietnam  | Yen Bai                    | 02/12/2015 | Cattle        | ME-SA | Ind-2001d | MZ851336 |
| 65 | O/VIT/03/2016 | Vietnam  | Quang Nam                  | 29/02/2016 | Cattle        | SEA   | Mya-98    | MZ851337 |
| 66 | O/VIT/20/2016 | Vietnam  | Son La                     | 23/09/2016 | Cattle        | ME-SA | Ind-2001d | MZ851338 |

ME-SA: Middle East-South Asia; SEA: Southeast Asia; NK: not known; ND: not done. The virus name with an asterisk (\*) at the end ( $n = 4$ ) were retrieved from GenBank and 54 capsid sequences were generated in this study.

**Table S2.** List of forward and reverse primers used to sequence the capsid coding region of serotype O FMD viruses used in this study.

| SL. No. | Name    | Sequence (5'-----3')       |
|---------|---------|----------------------------|
| 1       | L463F   | ACCTCCRACGGGTGGTACGC       |
| 2       | L490F   | GAYGAGGAITTYTACCCITGGAC    |
| 3       | OIA67F  | AACAAYTACTACATGCARCA       |
| 4       | OIB253F | ACIGACCACAARGGYGTCTA       |
| 5       | OIB439F | TTCATYAACCCIMGIACGAACATGAC |
| 6       | OIB454F | ACGAACATGACRGCACATC        |
| 7       | O1B535F | CTIGTGGTYATGGTYGTRGC       |
| 8       | O1C244F | GCAGCAAAACACATGTCAAACACCTT |
| 9       | O1C272F | TBGCRRGNCTYGCCCACTACTAC    |
| 10      | OIC283F | GCCCAGTACTACACACAGTACAG    |
| 11      | OIC499F | TACGCGTACACCGCGTC          |
| 12      | OIC564F | AATTACACATGGCAAGGCCGACACGG |
| 13      | OIC583F | GACGGYGAYGCICTGGTCGT       |
| 14      | O1D293F | TGGAYAACACCACYAAYCCAAC     |
| 15      | OID296F | ACAACACCACCAACCCAAC        |

|    |          |                                |
|----|----------|--------------------------------|
| 16 | O1B40R   | CCGTTRCGRGTRGTGAGGATGCCGGTC    |
| 17 | OIB190R  | GTGACCCARTCRAAIARRTGGGT        |
| 18 | OIB200R  | CGAGGAGCTRGRACCCAGTC           |
| 19 | OIB253R  | GCCGTAGACRCCYTTCTGGTCAGT       |
| 20 | OIB439R  | GTCATGTTCTGTICKIGGGTTTRATGAA   |
| 21 | OIB529R  | ACRACCATRACCACRAGGGTCCA        |
| 22 | OIC286R  | GTGCCRCTGTACTGKGTGTAGTACTG     |
| 23 | OIC329R  | TTGAACACTTTCCCGTA              |
| 24 | OIC361R  | GGI GGG GCR TAI GCA AYC ATG TA |
| 25 | OIC386R  | GTGTTTGACATGTGCTTTG            |
| 26 | O1D95R   | ATGAACGAGACRTCYGTGTG           |
| 27 | OID125R  | TGTCACYTTCACRAAYCT             |
| 28 | OID475R  | ATIGCICCRWARTTRAARGAIGTIGGCAG  |
| 29 | OID628R  | GTTGGGTGGTGGTGTGTGT            |
| 30 | EUR2B52R | GACATGTCCTCCTGCATCTGGTTGAT     |
| 31 | NK72     | GAAGGGCCCAGGGTTGGACTC          |
